# Supplementary material for: Molecular and supramolecular features of oxo-peroxovanadium complexes containing O3N, O2N2and ON3donor sets
Source: Royal Society of Chemistry journal article supplement (doi:10.1039/b315291j), 2004-01-01
Supplement: b315291j.doc [file b315291j.doc]

**Molecular and supramolecular features of oxo-peroxovanadium complexes containing *O*3*N*, *O*2*N*2 and *ON*3 donor sets**

# Marian Časný and Dieter Rehder*

____________________________________________________

**Electronic supplementary information (ESI) available**: Table S1: Overview of the preparation of compounds **1** to **7**; Table S2: Structure details of the O=V(carboxylic acid/carboxylate) moieties in **1a** and **1b**; Scheme S1: Structure details of 2**1a**[ClO4]·**1b**·2.25H2O. Additional experimental details: Syntheses of [*n*Bu4]**3**, K[**3**]·H2O, alternative route to **6**[ClO4], [**6**]Cl, **7**.

# Table S1 Overview of the preparation of compounds 1 to 7.

| Compound | Vanadium precursor | Ligand | Peroxide | Addition of |
| --- | --- | --- | --- | --- |
| **1a**[ClO4]/**1b** | K[VO3] | Hbpa/bpa(1-) | H2O2 | HClO4 |
| K**2** | K[VO3] | heida(2-) | H2O2 | - |
| [*n*Bu4N]**3** | V2O5 | 3OH-pic(1-) | H2O2 | [*n*Bu4N]OH |
| [NH4]**3** | [NH4][VO3] | 3OH-pic(1-) | H2O2 | 1. NH3, 2. HCl |
| K**3** | K[VO3] | 3OH-pic(1-) | H2O2 | - |
| [*n*Bu4N]**4** | V2O5 | 3OH-pic(1-) | - | [*n*Bu4N]OH |
| **5** | K[VO3] | 3OH-pic(1-) | *t*BuO2H | HClO4 |
| **6**[ClO4] | V2O5 | 3OH-pa | H2O2 | HClO4 |
| **6**[ClO4] | [NH4][VO3] | 3OH-pa | H2O2 | HClO4 |
| **6**Cl | V2O5 | 3OH-pa | H2O2 | HCl |
| **7** | K[VO3] | 3OH-pa | *t*BuO2H | HClO4 |

**Table S2** Structure details of the O=V(carboxylic acid/carboxylate) moieties in **1a** and **1b**.

|  | **1a** in  **1a**[ClO4]·2H2O | **1a** in  2**1a**[ClO4]·**1b**·2.25H2O | **1b** in  2**1a**[ClO4]·**1b**·2.25H2O |
| --- | --- | --- | --- |
|  |  |  |  |
| V-O3/O1 | 158.77(15) | 160.2/159.1(2) | 159.7(2) |
| V-O4 | 220.95(16) | 224.8/220.1(4) | 218.2(2) |
| C1-O4 | 122.2(3) | 125.0/121.7(4) | 126.0(4) |
| C1-O5 | 130.2(3) | 128.1/131.0(4) | 126.9(4) |
| O5-H5 | 82.01(10) | 83.8/84.0(5) | - |
| O3/O1-V-O4 | 172.25(7) | 170.05/171.11(11) | 169.21(10) |
| V-O4-C1/C15 | 126.58(14) | 128.9/124.7(2) | 129.7(2) |
| O4-C1/C15-O5 | 122.0(2) | 123.6/122.2(3) | 121.8(3) |

<**Scheme S1 here**>

Additional experimental details:

**[*n*Bu4N][VO(O2)(3OH-pic)], [*n*Bu4N]3**. V2O5 (455 mg, 2.5 mmol) was dissolved in in ice cold H2O2 (2 cm3) and water (10 cm3). 3-Hydroxypicolinic acid (1.39 g, 10 mmol) dissolved in water (5 cm3) was treated with a solution of [*n*Bu4N]OH (8 cm3) and stirred for 15 min. The two solutions were mixed to yield a red solution, from which a red micro-crystalline powder began to precipitate. The solution was reduced in vacuo to half of its volume and allowed to stand at –20 °C for several days. Dark red single crystals were thus obtained. Yield 1.20 g (39%). (Found: C, 53.68; H, 6.82; N, 6.73. Calc. for C28H44N3O9V: C, 54.45; H, 7.18; N, 6.80%).

**K[VO(O2)(3OH-pic)]·H2O, K[3]·H2O.** K[VO3] (345 mg, 2.5 mmol) was dissolved in water (15 cm3), cooled to 0 °C and treated with H2O2 (1 cm3). To this solution, 3-hydroxypicolinic acid (695 mg, 5 mmol) dissolved in water (5 cm3) was added. The solution became turbid and slowly changed its colour to yellowish. Stirring for 1 h yielded a yellow precipitate, which was filtered off, washed with a small amount of ice-cold water, and dried in vacuo. Yield 150 mg (12%). 51V NMR (H2O/D2O): ** ‑574. 17O NMR (D2O): ** 598.C12H8N2KO9V·H2O: C, 33.34; H, 2.33; N, 6.48%).

**[VO(O2)(3OH-pa)2][ClO4], 6[ClO4].** Alternative route: V2O5 (455 mg, 2.55 mmol) was dissolved in H2O2 (3 cm3) and water (10 cm3) at 0 °C. The pH of this solution was adjusted to 1.2. 3-Hydroxypicolylamide (1.28 g, 10 mmol) was added. After 30 min. of stirring, conc. HClO4 (0.5 cm3) was added to accomplish complete dissolution. The dark red solution (pH 1) was filtered and allowed to stand at 4 °C for 2 days. Light red **6**[ClO4] precipitated, which was filtered off, washed with a small amount of cold ethanol and dried. Yield 560 mg (22%). 51V NMR (H2O/D2O): ** ‑586, ‑607. (Found: C, 28.66; H, 3.34; N, 10.73; Cl, 6.96; V, 9.50. Calc. for C12H12N4ClO11V·2H2O: C, 28.22; H, 3.16; N, 10.97; Cl, 6.94; V, 9.98%).

**[VO(O2)(3OH-pa)2]Cl, [6]Cl.** V2O5 (455 mg, 2.5 mmol) was dissolved in cold H2O2 (5 cm3), water (10 cm3) and conc. HCl (0.5 cm3) and added, in the cold and with stirring, to a solution of 3-hydroxypicolylamide (1.38 g, 10 mmol) in water (5 cm3). The mixture was stirred for 15 min. An orange-yellow foam formed, which finally dissolved to generate a dark red solution, from which light yellow, powdery **6**Cl precipitated within 2 days at 4 °C. The precipitate was filtered off, washed with a small amount of cold ethanol and dried in vacuo. Yield 890 mg (40%). (Found: C, 31.54; H, 4.95; N, 11.95; Cl, 7.61; V, 11.37. Calc. for C12H12N4ClO7V·2H2O: C, 32.27; H, 3.61; N, 12.54; Cl, 7.94; V, 11.40%).

**[VO(*t*BuOO)(3OH-pa)2]2+, 7.** K[VO3] (138 mg, 1 mmol) was dissolved in water (2 cm3) and mixed, under cooling in an ice-bath, with *tert*.butylhydroperoxide (1.0 cm3, 7.4 mmol). The solution was stirred moderately for 15 min. and then treated with 3-hydroxypicolylamide (696 mg, 5 mmol) and conc. HClO4 (2 cm3). The dark red solution was characterised by 51V NMR: ** ‑530, ‑588.
